# Supplementary material for: Light Conversion upon Photoexcitation of NaBiF4:Yb3+/Ho3+/Ce3+ Nanocrystalline Particles
Source: MDPI journal article supplement (doi:10.3390/nano13040672), 2023-02-09
Supplement: s1 [file s1]

# Light Conversion upon Photoexcitation of NaBiF<sub>4</sub>:Yb<sup>3+</sup>/Ho<sup>3+</sup>/Ce<sup>3+</sup> Nanocrystalline Particles

Enrico Trave <sup>1,\*</sup>, Michele Back <sup>1,\*</sup>, Davide Pollon <sup>1</sup>, Emmanuele Ambrosi <sup>1</sup> and Leonardo Puppulin <sup>1,2</sup>

<sup>1</sup> Department of Molecular Sciences and Nanosystems, Università Ca' Foscari Venezia, Via Torino 155, 30172 Venice, Italy; pollon.davide@gmail.com (D.P.); emmanuele.kizito@gmail.com (E.A.); leonardo.puppulin@unive.it (L.P.)

<sup>2</sup> WPI Nano Life Science Institute (WPI-NanoLSI), Kanazawa University, Kanazawa, Ishikawa 920-1192, Japan

\* Correspondence: enrico.trave@unive.it (E.T.); michele.back@unive.it (M.B.)

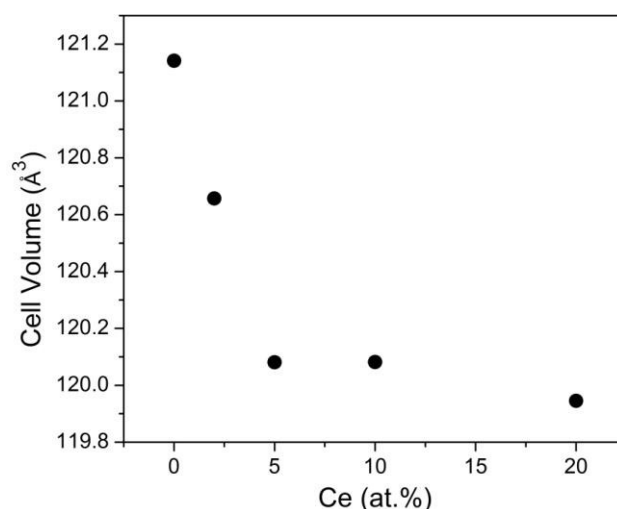

**Figure S1.** Trend of cell volume vs. Ce<sup>3+</sup> content; cell volume estimation was obtained from fitting of XRPD patterns reported in Figure 1(a).

**Citation:** Trave, E.; Back, M.; Pollon, D.; Ambrosi, E.; Puppulin, L. Light Conversion upon Photoexcitation of NaBiF<sub>4</sub>:Yb<sup>3+</sup>/Ho<sup>3+</sup>/Ce<sup>3+</sup> Nanocrystalline Particles. *Nanomaterials* **2023**, *13*, 672. <https://doi.org/10.3390/nano13040672>

Academic Editors: Vincenzo Vaiano

Received: 29 December 2022

Revised: 1 February 2023

Accepted: 5 February 2023

Published: 9 February 2023

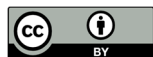

**Copyright:** © 2023 by the authors. Licensee MDPI, Basel, Switzerland. This article is an open access article distributed under the terms and conditions of the Creative Commons Attribution (CC BY) license (<https://creativecommons.org/licenses/by/4.0/>).

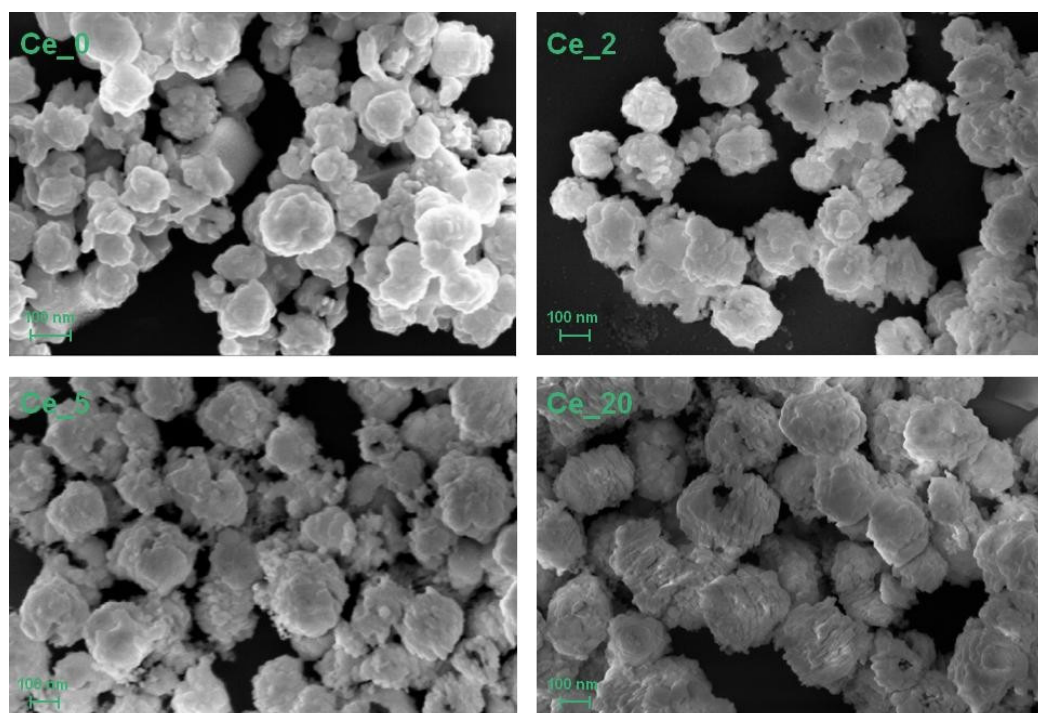

**Figure S2.** FE-SEM images of Ce<sub>0</sub>, Ce<sub>2</sub>, Ce<sub>5</sub> and Ce<sub>20</sub> samples.

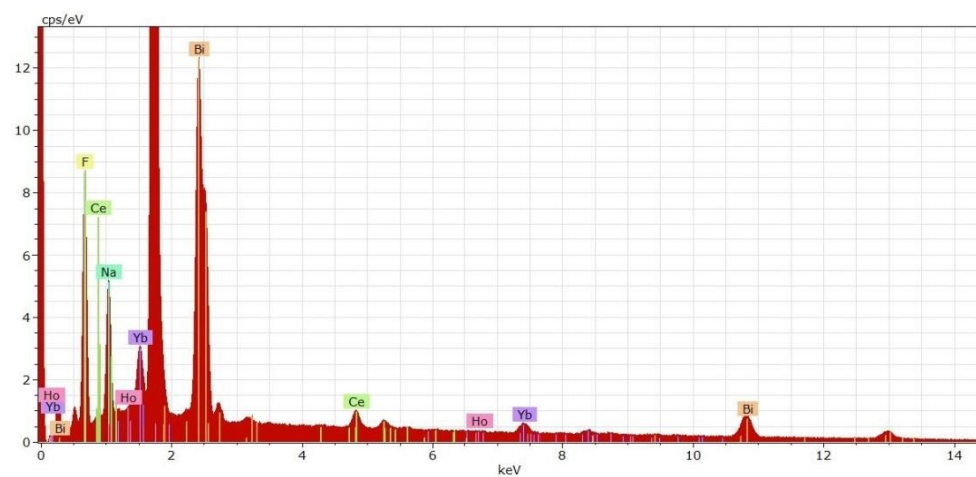

**Figure S3.** EDS spectrum of Ce\_10 sample.

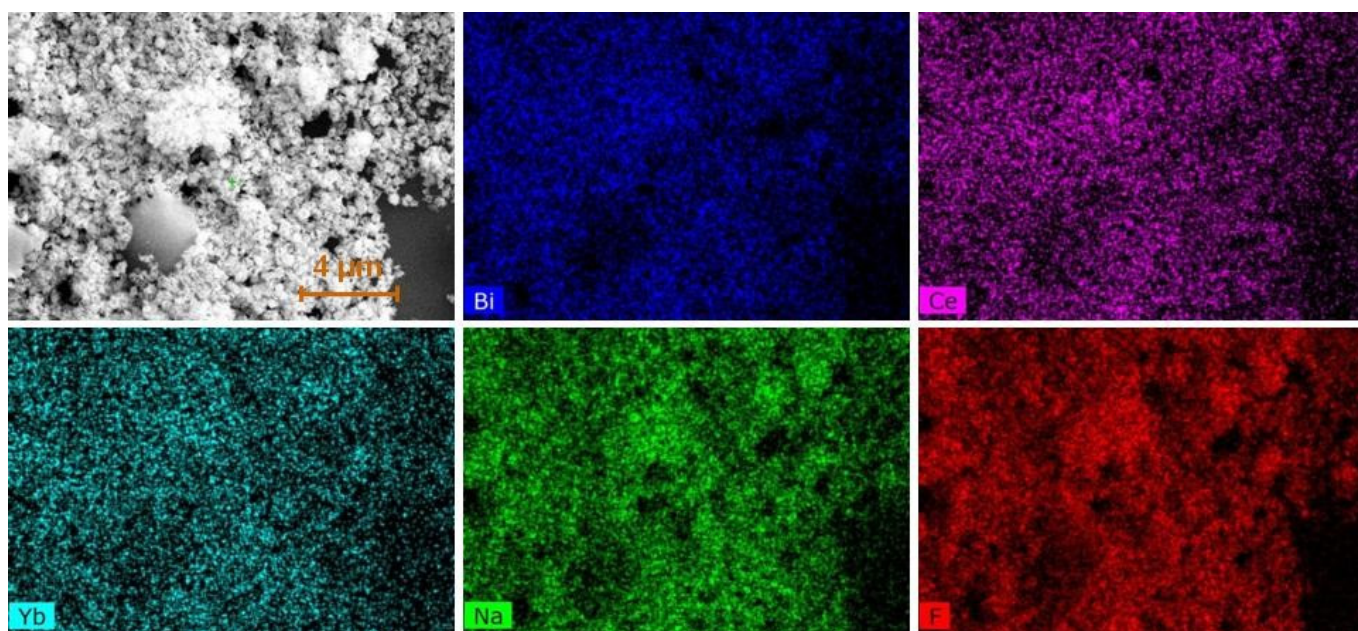

**Figure S4.** FE-SEM image and elemental maps of Ce\_10 sample.
